# Supplementary material for: Performance of a Point-of-Care Test for the Rapid Detection of SARS-CoV-2 Antigen
Source: MDPI journal article supplement (doi:10.3390/microorganisms9010058), 2020-12-28
Supplement: s1 [file s1]

**Table S2: Specific detection of SARS-CoV-2 RNA by the laboratory-developed triplex RT-PCRs**

| Virus                                   | EQA<br>(Instand e.V.) | SARS-CoV-2<br>copies/ml<br>(Instand e.V.) | Ct-value |        |
|-----------------------------------------|-----------------------|-------------------------------------------|----------|--------|
|                                         |                       |                                           | E-gene   | N-gene |
| Coronaviruses                           |                       |                                           |          |        |
| SARS-CoV-2                              | 340059/20             | 17,071,604                                | 22.80    | 25.66  |
| SARS-CoV-2                              | 340063/20             | 2,198,982                                 | 25.59    | 28.71  |
| SARS-CoV-2                              | 340069/20             | 268,471                                   | 28.51    | 31.78  |
| SARS-CoV-2                              | 340064/20             | 220,046                                   | 28.82    | 32.37  |
| SARS-CoV-2                              | 340061/20             | 25,978                                    | 32.44    | 36.24  |
| SARS-CoV-2                              | 340073/20             | 25,002                                    | 32.58    | 35.73  |
| SARS-CoV-2                              | 340066/20             | 2943                                      | 35.58    | 38.25  |
| SARS-CoV-2                              | 340071/20             | 294                                       | 38.10    | neg    |
| MERS-CoV                                | 340051/19             |                                           | neg      | neg    |
| MERS-CoV                                | 340067/20             |                                           | neg      | neg    |
| HCoV 229E                               | 340052/19             |                                           | neg      | neg    |
| HCoV 229E                               | 340065/20             |                                           | neg      | neg    |
| HCoV 229E                               | 340068/20             |                                           | neg      | neg    |
| HCoV NL63                               | 340047/19             |                                           | neg      | neg    |
| HCoV NL63                               | 340072/20             |                                           | neg      | neg    |
| HCoV OC43                               | 340050/19             |                                           | neg      | neg    |
| HCoV OC43                               | 340060/20             |                                           | neg      | neg    |
| HCoV OC43                               | 340074/20             |                                           | neg      | neg    |
| Coronavirus negative                    | 340062/20             |                                           | neg      | neg    |
| Coronavirus negative                    | 340070/20             |                                           | neg      | neg    |
| Other respiratory viruses               |                       |                                           |          |        |
| Enterovirus<br>(Coxsackievirus A21)     | 372077/19             |                                           | neg      | neg    |
| Influenza A virus<br>(A(H1N1)pdm09)     | 370120/20             |                                           | neg      | neg    |
| Influenza B virus<br>(B/Victoria-Linie) | 370119/20             |                                           | neg      | neg    |
| Metapneumovirus (Type A)                | 385047/19             |                                           | neg      | neg    |
| Parainfluenzavirus (PIV-2)              | 388052/20             |                                           | neg      | neg    |
| Respiratory syncytial virus<br>(RSV A)  | 359057/19             |                                           | neg      | neg    |
| Rhinovirus<br>(HRV A Type 30)           | 393035/19             |                                           | neg      | neg    |
