# Supplementary material for: Performance of a Point-of-Care Test for the Rapid Detection of SARS-CoV-2 Antigen
Source: MDPI journal article supplement (doi:10.3390/microorganisms9010058), 2020-12-28
Supplement: s1 [file s1]

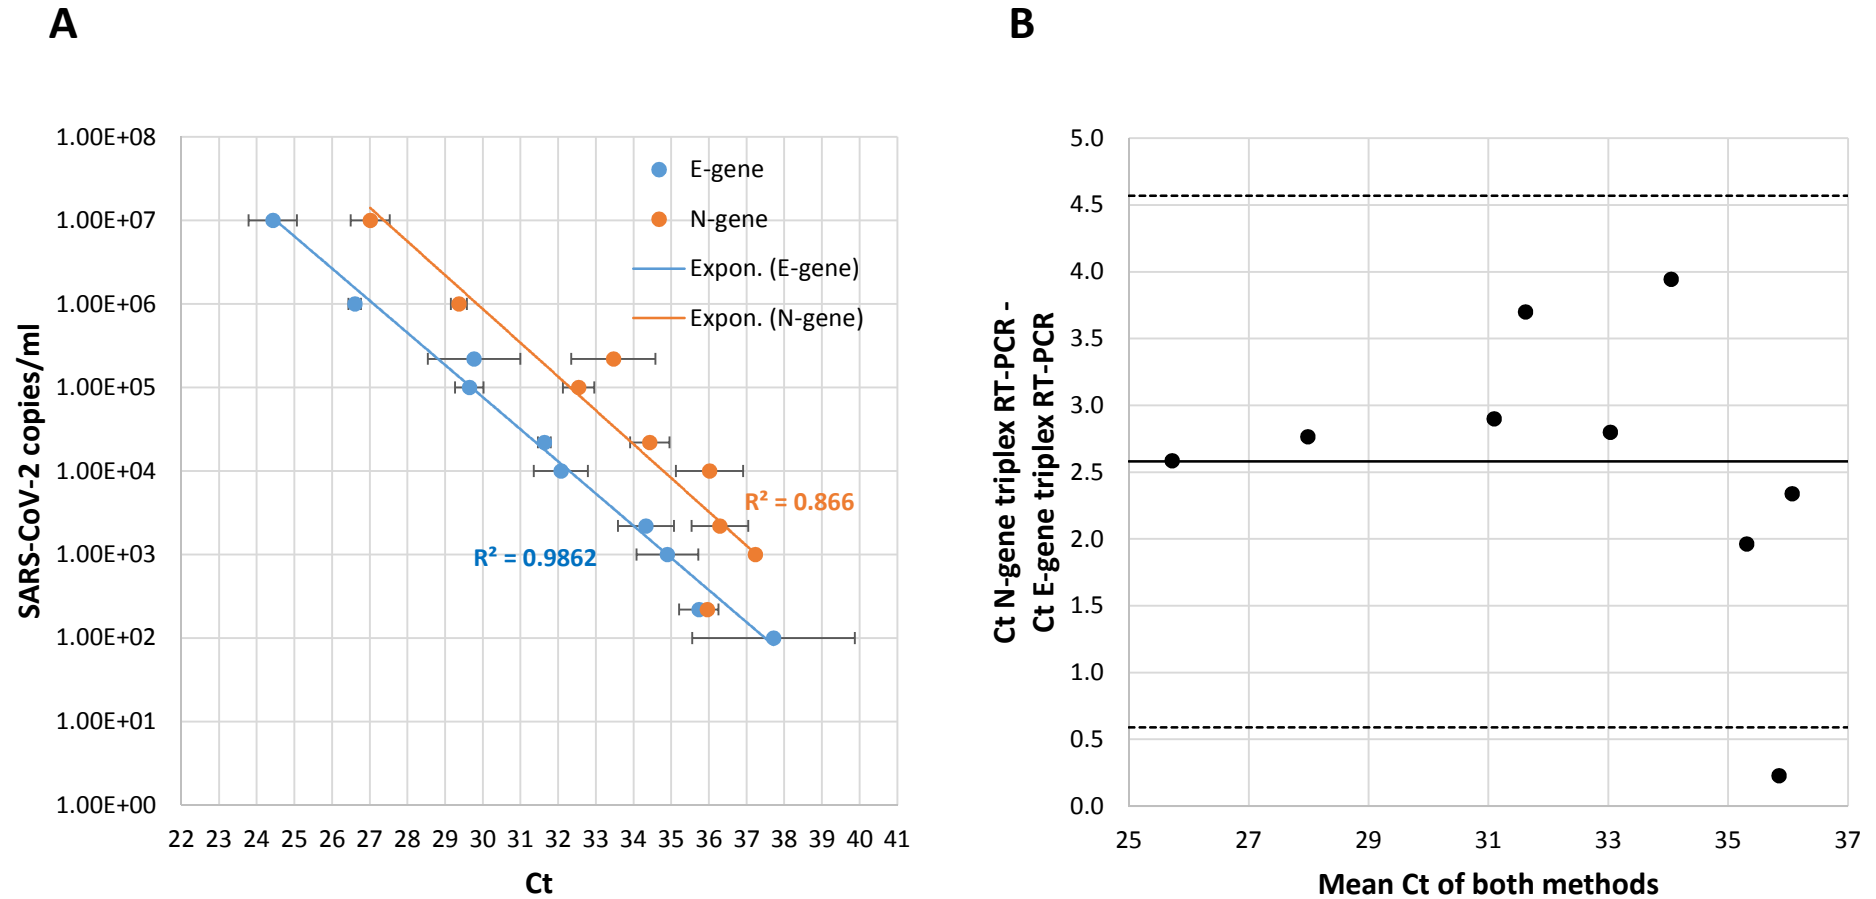

**Figure S1:** Linearity (A) and agreement (B) of the SARS-CoV-2 signal in the E- and N-gene triplex RT-PCRs. Two EQA-samples with pre-known SARS-CoV-2 load were diluted in a SARS-CoV-2 free human respiratory sample to obtain clinical specimens with defined SARS-CoV-2 copies/ml. Mean threshold cycle (Ct) values (and standard deviations) from up to six runs are given (A). The Bland-Altman-Plot (B) shows the bias (mean difference between the Ct values of both methods, solid line) with the 95% limits of agreement (dashed lines).
