# Supplementary material for: Performance of a Point-of-Care Test for the Rapid Detection of SARS-CoV-2 Antigen
Source: MDPI journal article supplement (doi:10.3390/microorganisms9010058), 2020-12-28
Supplement: s1 [file s1]

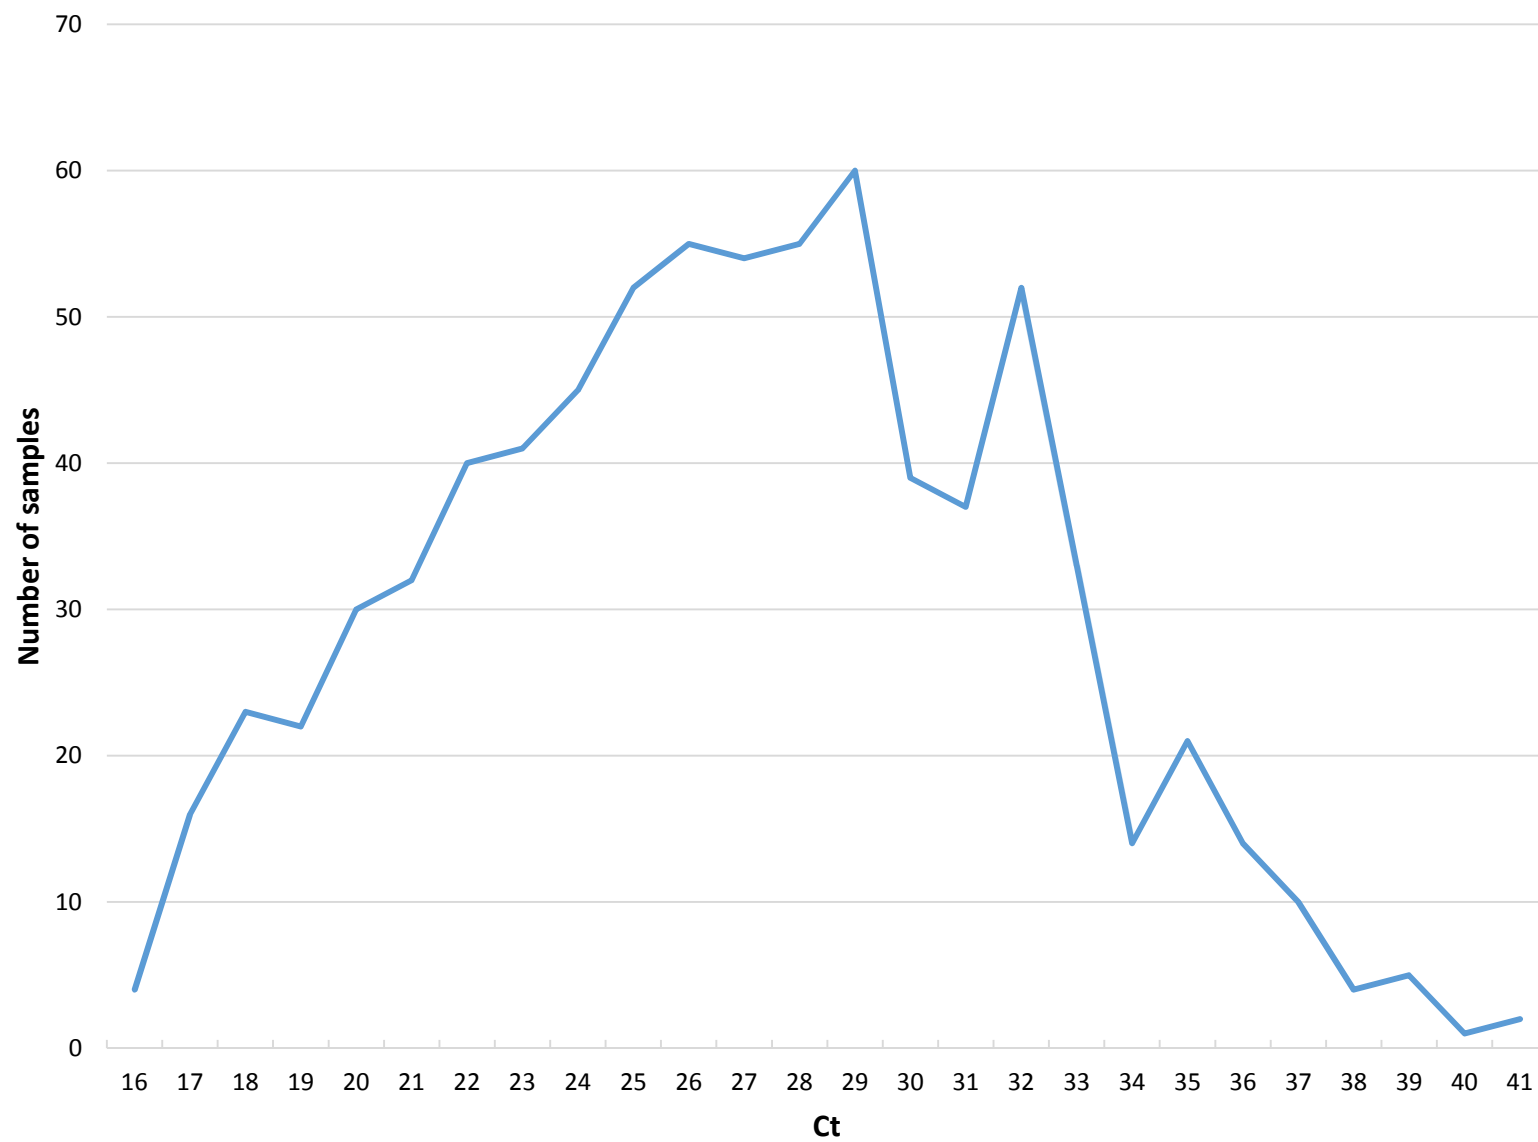

**Figure S4:** Frequency of SARS-CoV-2 RT-PCR threshold cycle (Ct) values in infected individuals. Results of cumulative data from our diagnostic laboratory, 30 August 2020 to 30 October 2020.
