# Supplementary material for: Performance of a Point-of-Care Test for the Rapid Detection of SARS-CoV-2 Antigen
Source: MDPI journal article supplement (doi:10.3390/microorganisms9010058), 2020-12-28
Supplement: s1 [file s1]

**A**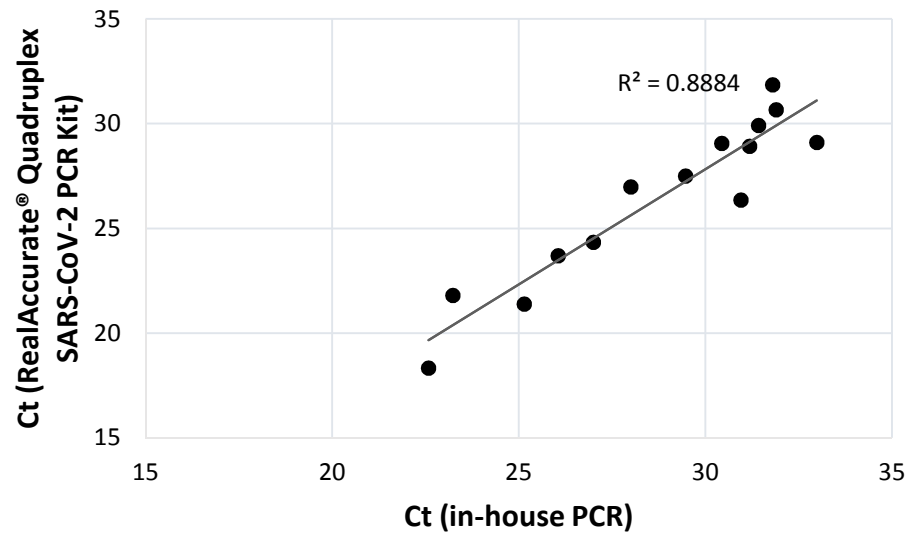**B**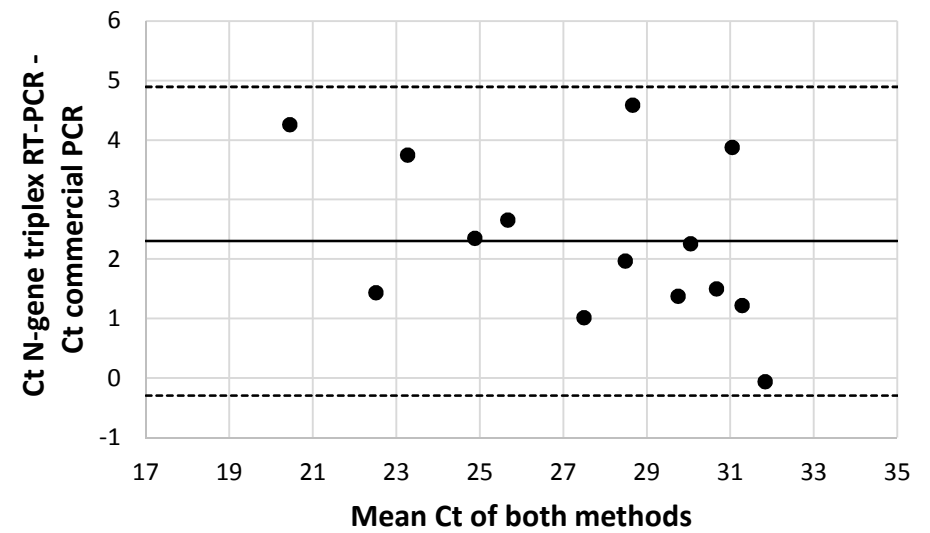

**Figure S3:** Comparison of the N-gene triplex RT-PCR to a commercial SARS-CoV-2 RT-PCR. Fourteen SARS-CoV-2 positive samples were tested in parallel by both assays and the threshold cycle (Ct) of the N-gene signals were compared (A). The Bland-Altman-Plot (B) shows the bias (mean difference between the Ct values of both methods, solid line) with the 95% limits of agreement (dashed lines).
