# Supplementary material for: Performance of a Point-of-Care Test for the Rapid Detection of SARS-CoV-2 Antigen
Source: MDPI journal article supplement (doi:10.3390/microorganisms9010058), 2020-12-28
Supplement: s1 [file s1]

**Table S1:** Primer and probe sequences of the laboratory-developed triplex RT-PCRs for detection of SARS-CoV-2, phi 6 phage and GAPDH

| Target                                                                                  | Designation of forward (F) and reverse (R) primer and probe (P) | Sequence (5'-3')<br><br>5'-dye and 3'-quencher (probe) | Reference |
|-----------------------------------------------------------------------------------------|-----------------------------------------------------------------|--------------------------------------------------------|-----------|
| SARS-CoV-2<br><br><i>E-gene</i>                                                         | SARS2-E-F*                                                      | ACAGGTACGTTAATAGTTAATAGCGT                             | [4]       |
|                                                                                         | SARS2-E-R*                                                      | ATATTGCAGCAGTACGCACACA                                 |           |
|                                                                                         | SARS2-E-P*                                                      | FAM-ACACTAGCCATCCTTACTGCGCTTCG-BMNQ530                 |           |
| SARS-CoV-2<br><br><i>N-gene</i>                                                         | SARS2-N-F*                                                      | CACATTGGCACCCGCAATC                                    |           |
|                                                                                         | SARS2-N-R*                                                      | GAGGAACGAGAAGAGGCTTG                                   |           |
|                                                                                         | SARS2-N-P*                                                      | FAM-ACTTCCTCAAGGAACAACATTGCCA-BMNQ530                  |           |
| Pseudomonas Phi 6 Phage                                                                 | Phi6-F                                                          | TGGCGGCGGTCAAGAGC                                      | [6]       |
|                                                                                         | Phi6-R                                                          | GGATGATTCTCCAGAAGCTGCTG                                |           |
|                                                                                         | Phi6-P                                                          | HEX-CGGTCGTCGCAGGTCTGACACTCGC-BMNQ535                  |           |
| GAPDH                                                                                   | GAPDH-F                                                         | GGACTGAGGCTCCCACCTTT                                   | [5]       |
|                                                                                         | GAPDH-R                                                         | GCATGGACTGTGGTCTGCAA                                   |           |
|                                                                                         | GAPDH-P (LC 2.0)                                                | Atto490LS-ATCCAAGACTGGCTCCTCCCTGC-BMNQ620              |           |
|                                                                                         | GAPDH-P (ABI 7500)                                              | Cy5-ATCCAAGACTGGCTCCTCCCTGC-BHQ2                       |           |
| *will also detect the SARS-CoV from 2002/2003 and SARS-related CoVs from bats (see [4]) |                                                                 |                                                        |           |
