# Supplementary material for: Performance of a Point-of-Care Test for the Rapid Detection of SARS-CoV-2 Antigen
Source: MDPI journal article supplement (doi:10.3390/microorganisms9010058), 2020-12-28
Supplement: s1 [file s1]

**A**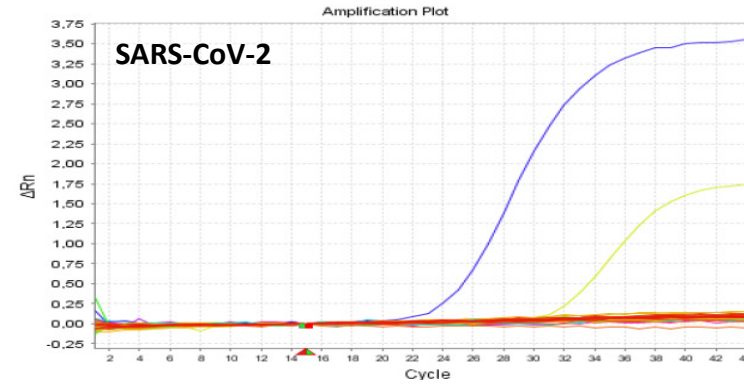**B**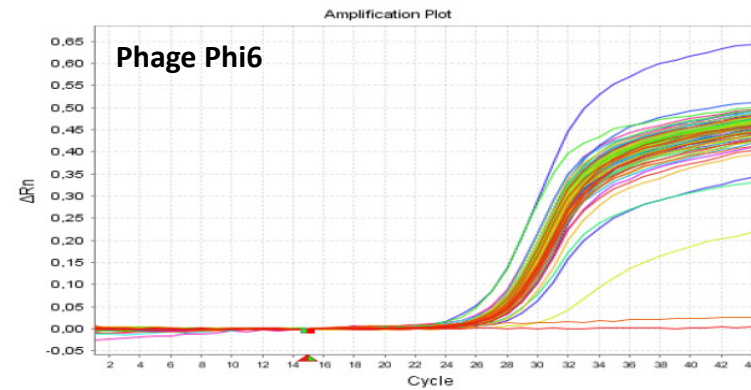**C**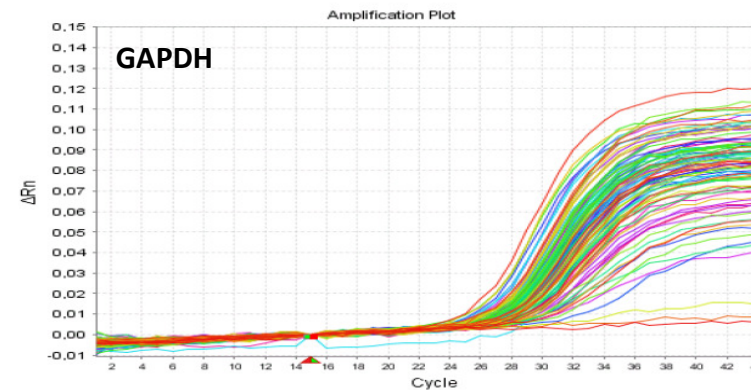

**Figure S2:** Example of a N-gene triplex RT-PCR experiment on the ABI7500. Samples from the upper respiratory tract (URT, N=93) and a combined SARS-CoV-2/phage Phi6 positive control (light green, parts A and B; GAPDH negative, part C) as well as two negative controls (red/orange in A-C) were examined. A SARS-CoV-2 infection was detected in one patient (blue, part A). The mean threshold cycle (Ct) of the RNA phage signal in the spiked URT samples is 26.9 (standard deviation, SD=0.5) and that of the GAPDH signal is 28.1 (SD=1.4).
