# Supplementary material for: Performance of a Point-of-Care Test for the Rapid Detection of SARS-CoV-2 Antigen
Source: Microorganisms. 2020 Dec 28;9(1):58. doi: 10.3390/microorganisms9010058 (PMC7823488; doi:10.3390/microorganisms9010058)
Supplement: Supplementary file 1 [file microorganisms-09-00058-s001.zip]

Archive with 6 entries (6 files):
- supplementary_material/Supplementary_Figure_1.pdf
- supplementary_material/Supplementary_Figure_2.pdf
- supplementary_material/Supplementary_Figure_3.pdf
- supplementary_material/Supplementary_Figure_4.pdf
- supplementary_material/Table S1.pdf
- supplementary_material/Table S2.pdf
